# Supplementary material for: Learning Outcomes and Educational Effectiveness of Social Media as a Continuing Professional Development Intervention for Practicing Surgeons: A Systematic Review and Narrative Synthesis
Source: PubMed Central journal article supplement — Ann Surg Open. 2024 Jul 9;5(3):e470. doi: 10.1097/AS9.0000000000000470 (PMC11415111; doi:10.1097/as9.0000000000000470), 2024-07-09
Supplement: as9-5-e470-s001.pdf [file as9-5-e470-s001.pdf]

## Supplement 1: Moore's Expanded Outcomes Framework for Assessing Learners and Evaluating Instructional Activities

| Level                                | Description                                                                                                                         |
|--------------------------------------|-------------------------------------------------------------------------------------------------------------------------------------|
| Level 1<br>Participation             | Number and description of learners who participated in the study.                                                                   |
| Level 2<br>Satisfaction              | Degree to which expectations of participants were met regarding the setting and delivery of the educational activity.               |
| Level 3A<br>Declarative<br>Knowledge | Degree to which participants state what the educational activity intended them to know.                                             |
| Level 3B<br>Procedural<br>Knowledge  | Degree to which participants state how to do what the educational activity intended them to be able to do.                          |
| Level 4<br>Competence                | Degree to which participants show in an educational setting how to do what the educational activity intended them to be able to do. |
| Level 5<br>Performance               | The degree to which participants do what the educational activity intended them to be able to do in their practice.                 |
| Level 6<br>Patient Health            | The degree to which the health status of patients improves due to changes in practice behavior of participants.                     |
| Level 7<br>Community Health          | The degree to which the health status of a community of patients changes due to changes in the practice behavior of participants.   |
