# Supplementary material for: Learning Outcomes and Educational Effectiveness of Social Media as a Continuing Professional Development Intervention for Practicing Surgeons: A Systematic Review and Narrative Synthesis
Source: PubMed Central journal article supplement — Ann Surg Open. 2024 Jul 9;5(3):e470. doi: 10.1097/AS9.0000000000000470 (PMC11415111; doi:10.1097/as9.0000000000000470), 2024-07-09
Supplement: as9-5-e470-s002.pdf [file as9-5-e470-s002.pdf]

## Supplement 2: Detailed Search Strategy, 1946 – September 13, 2022

|                                                                       |
|-----------------------------------------------------------------------|
| 1. surgeons/ or neurosurgeons/ or orthopedic surgeons/                |
| 2. exp Specialties, Surgical/                                         |
| 3. exp Surgical Procedures, Operative/                                |
| 4. 1 or 2 or 3                                                        |
| 5. Social Media/                                                      |
| 6. youtube.mp.                                                        |
| 7. twitter.mp.                                                        |
| 8. Instagram.mp.                                                      |
| 9. Facebook.mp.                                                       |
| 10. social networking/ or online social networking/                   |
| 11. LinkedIn.mp.                                                      |
| 12. Reddit.mp.                                                        |
| 13. TikTok.mp.                                                        |
| 14. SnapChat.mp.                                                      |
| 15. Whatsapp.mp.                                                      |
| 16. 5 or 6 or 7 or 8 or 9 or 10 or 11 or 12 or 13 or 14 or 15         |
| 17. exp Specialties, Surgical/ed [Education]                          |
| 18. exp Education, Medical, Continuing/ or exp Education, Continuing/ |
| 19. Continuous education.mp.                                          |
| 20. Education, Professional/                                          |
| 21. continuing professional development.mp.                           |
| 22. 17 or 18 or 19 or 20 or 21                                        |
| 23. 4 and 16 and 22                                                   |
| 24. limit 23 to english language                                      |
