# Supplementary material for: Learning Outcomes and Educational Effectiveness of Social Media as a Continuing Professional Development Intervention for Practicing Surgeons: A Systematic Review and Narrative Synthesis
Source: PubMed Central journal article supplement — Ann Surg Open. 2024 Jul 9;5(3):e470. doi: 10.1097/AS9.0000000000000470 (PMC11415111; doi:10.1097/as9.0000000000000470), 2024-07-09
Supplement: as9-5-e470-s003.pdf [file as9-5-e470-s003.pdf]

### Supplement 3: Medical Education Research Study Quality Instrument (MERSQI) Components

| Domain: Item                                       | Response Options: Scores                                                                                                                                                                                                                             | Operational Definition                                                                                                                                                                                                                                                                                                                                                                                                                                                                                                                                                                                                                                                                                                                            |
|----------------------------------------------------|------------------------------------------------------------------------------------------------------------------------------------------------------------------------------------------------------------------------------------------------------|---------------------------------------------------------------------------------------------------------------------------------------------------------------------------------------------------------------------------------------------------------------------------------------------------------------------------------------------------------------------------------------------------------------------------------------------------------------------------------------------------------------------------------------------------------------------------------------------------------------------------------------------------------------------------------------------------------------------------------------------------|
| Study Design                                       | <ul style="list-style-type: none"> <li>• Single-group cross-sectional or single-group post-test only: 1</li> <li>• Single-group pretest and post-test: 1.5</li> <li>• Nonrandomized, 2 group: 2</li> <li>• Randomized controlled trial: 3</li> </ul> | <ul style="list-style-type: none"> <li>• Survey studies are cross-sectional.</li> <li>• Case-control and cohort studies (2 or more defined cohorts) are considered 2-group nonrandomized.</li> </ul>                                                                                                                                                                                                                                                                                                                                                                                                                                                                                                                                              |
| Sampling: institutions                             | <ul style="list-style-type: none"> <li>• 1 institution: 0.5</li> <li>• 2 institutions: 1</li> <li>• 3 or more institutions: 1.5</li> </ul>                                                                                                           | <ul style="list-style-type: none"> <li>• Number of institutions refers to origin of study participants (not study authors).</li> </ul>                                                                                                                                                                                                                                                                                                                                                                                                                                                                                                                                                                                                            |
| Sampling: response rate                            | <ul style="list-style-type: none"> <li>• Not applicable</li> <li>• &lt; 50% or not reported: 0.5</li> <li>• 50%–74%: 1</li> <li>• ≥ 75%: 1.5</li> </ul>                                                                                              | <ul style="list-style-type: none"> <li>• Response rate is the proportion of those eligible who completed the posttest or survey. For intervention studies, this is the proportion of those enrolled who completed the intervention evaluation.</li> <li>• Use "not applicable" only if a response rate truly does not apply (e.g., data obtained from a medical record or professional organization database).</li> </ul>                                                                                                                                                                                                                                                                                                                         |
| Type of data                                       | <ul style="list-style-type: none"> <li>• Assessment by study participant: 1</li> <li>• Objective: 3</li> </ul>                                                                                                                                       | <ul style="list-style-type: none"> <li>• Observer ratings are considered objective.</li> </ul>                                                                                                                                                                                                                                                                                                                                                                                                                                                                                                                                                                                                                                                    |
| Validity evidence for evaluation instrument scores | <ul style="list-style-type: none"> <li>• Not applicable</li> <li>• Content: 1</li> <li>• Internal structure: 1</li> <li>• Relationships to other variables: 1</li> </ul>                                                                             | <ul style="list-style-type: none"> <li>• Relevant content evidence would include using theory, guidelines, experts, and existing instruments to identify or refine the instrument.</li> <li>• Relevant internal structure evidence would include all reliability (internal consistency, interrater, interstation, and test-retest) and factor analysis.</li> <li>• Relevant evidence of relationships to other variables would include expert-novice comparisons and concurrent or predictive correlation with other variables.</li> <li>• Use “not applicable” only if the study does not measure a psychological construct <i>and</i> there is no instrument to rate (e.g., gender as the sole outcome); should be used very rarely.</li> </ul> |
| Data analysis: sophistication                      | <ul style="list-style-type: none"> <li>• Descriptive analysis only: 1</li> <li>• Beyond descriptive analysis: 2</li> </ul>                                                                                                                           | <ul style="list-style-type: none"> <li>• Descriptive analyses include frequency, mean, and median.</li> <li>• Any test of statistical inference is considered “beyond descriptive.”</li> </ul>                                                                                                                                                                                                                                                                                                                                                                                                                                                                                                                                                    |

|                               |                                                                                                                                                                                                                          |                                                                                                                                                                                                                                                                                                                                                                                                                                                            |
|-------------------------------|--------------------------------------------------------------------------------------------------------------------------------------------------------------------------------------------------------------------------|------------------------------------------------------------------------------------------------------------------------------------------------------------------------------------------------------------------------------------------------------------------------------------------------------------------------------------------------------------------------------------------------------------------------------------------------------------|
| Data analysis:<br>appropriate | <ul style="list-style-type: none"> <li>• Data analysis appropriate for study design and type of data: 1</li> </ul>                                                                                                       | <ul style="list-style-type: none"> <li>• Considered “no” if there is a statistical error or if authors failed to analyze data at all.</li> </ul>                                                                                                                                                                                                                                                                                                           |
| Outcome                       | <ul style="list-style-type: none"> <li>• Satisfaction, attitudes, perceptions, opinions, general facts: 1</li> <li>• Knowledge, skills: 1.5</li> <li>• Behaviors: 2</li> <li>• Patient/health care outcome: 3</li> </ul> | <ul style="list-style-type: none"> <li>• General facts include participant demographics.</li> <li>• Knowledge/skills are in a test setting (paper, computer, simulation, or patients in a nonauthentic setting).</li> <li>• Behaviors are physician actions with real patients in a clinical context, or other activities in a real context.</li> <li>• Patient/health care outcomes are actual effects on real patients, programs, or society.</li> </ul> |
